# Supplementary material for: A systematic review of spatial decision support systems in public health informatics supporting the identification of high risk areas for zoonotic disease outbreaks
Source: Int J Health Geogr. 2018 Oct 30;17:38. doi: 10.1186/s12942-018-0157-5 (PMC6208014; doi:10.1186/s12942-018-0157-5)
Supplement: Supplementary file 1 — Additional file 1. Full text screening summary: Full text articles reviewed for inclusion and exclusion criteria. [file 12942_2018_157_MOESM1_ESM.xlsx]

## Sheet: Sheet1
Author(s)	System	Date	Language	Exlcude/Include		Summary of exclusions
Ahmed et al	eDEWS	2013	English	No spatial analysis/visualization		database/monitoring system	5							v
Ali et al	ID-Viewer	2016	English	Include		modeling only	7
Arsevska et al	Padiweb	2018	English	No spatial analysis/visualization		not for target user	5
Bakr et al	ADSDSS	2015	English	Include		No spatial analysis/visualization	14
Bouden et al	WNV-MAGS	2008	English	Include		No development	1
Brownstein et al	Healthmap	2008	English	Not an SDSS, for disease monitoring/database		Not for zoonotic/infectious disease	9
Bui et al	general WEB GIS	2016	English	Include		Total excluded	41
Burkom et al	ESSENCE- module	2010	English	Modeling only
Camitz	STATFLU	2009	English	Not for zoonotic/infectious disease
Campbell et al	OpenEssence	2012	English	Include
Carney et al	Dycast	2011	English	Include
Chame et al	SISS-GEO	2018	English	Include
Chen et al	WEB GIS	2016	English	Include
Chester	BioSense 2.0	2013	English	Not an SDSS, for disease monitoring/database
Claes et al	Empresi genetic module	2014	English	No spatial analysis/visualization
Cox et al	MIS	2014	English	Not integrated system, for modeling
Delmelle et al	H.E.L.P.	2011	English	Include
Deodhar et al	DISmimS	2014	English	No spatial analysis/visualization
Dominkovics et al	SDSS	2011	English	Does not target zoonotic tuberculosis
Erranguntla et al	IPAS	2017	English	Include
Evans et al	Heimtsa	2012	English	not for zoonotic/infectious disease
Fahnrich et al	Sormas	2015	English	No spatial analysis/visualization
Ferre et al	GeoCrev	2011	English	Include
Foley et al	MosquitoMap	2011	English	Include
Gao et al	Spatial Fusion Enterpise	2008	English	Include
Gesteland et al	EpiCanvas	2012	English	Include
Guo et al	Oscar	2017	English	Include
Hernandez-Avila et al	Dengue-GIS	2013	English	Include
Huang et al	VBD-AIR	2012	English	Include
Iannetti et al	EpiTrace/SIMAN	2014	English	Include
Ivorra et al	Be-CoDis	2015	English	No spatial analysis/visualization
Janies et al	Geogenes	2012	English	No outreach to ph officials, also is a web service, and database
Janies et al	Supramap	2011	English	Not for public health officials
Jardine et al	Health Tracks	2014	English	Not for zoonotic/infectious disease
Jombart et al	OutbreakTools	2014	English	Not for public health officials
Joshi et al	GeoViz	2012	English	Framework
Kelly	SDSS	2013	English	Include
Kienberger et al.	AGX	2013	English	Modeling, not fully implemented
Kling et al.	CASE	2010-12	English	No spatial analysis/visualization
Kshirsagar et al.	GLEWS	2013	English	network of databases
Lal et al.	Outbreak detector	2018	English	No spatial analysis/visualization
Li et al.	EHIS	2008	English	not for zoonotic/infectious disease
Li et al.	DSSRIDE	2012	English	Include
Lorenzo et al.	Arbo-zoonet	2016	English	Include
MacDonald et al.	SeqMonitor	2009	English	Not for public health officials
Maceijewski et al.	PanViz	2011	English	Include
Martinez-Beneito et al.	SDSS	2011	English	not an integrated system, but a model
Moraga	SpatialEpiApp	2017	English	include
Nieves et al	EpiInfo	devekoped initially over 20 years ago	English	no development
Noremark et al.	EpiContactrace	2014	English	No spatial analysis/visualization
Paoletti et al.	InfluenzaNet	2013	English	No spatial analysis/visualization
Parks etal.	GenGis	2009	English	Not for public health officials
Peng et al.	AIDS sdss	2014	English	include
Perez et al.	BioPortal	2009	English	include
Platz et al.	EWARS		English	include
Porcasi et al.	HAP	2012	English	include
Ramanathan et al.	ORBIT	2015	English	Toolkit of machine learning algorithms for data integration, not spatial analysis/visualization
Ramirez-Ramirez et al.	SIMID	2013	English	include
Rao et al.	Searums	2009	English	include
Rees et al.	RageDB	2011	English	include
Savini et al.	DMD	2018	English	include
Schrimini et al.	GeMinia	2010	English	database
Sloot et al.	ViroLab	2009	English	clinical decision aid, drug ranking
Sopan et al.	CommHealth Map	2012	English	clinical setting
Stein et al.	AsiaFluCap	2012	English	No spatial analysis/visualization
Studnicki et al.	CATCH	2013	English	generic clinical data dss
Sutcliffe et al.	Advises		English	generic health assessments
Thomas et al.	SDSS	2014	English	not an sdss, map modeling
Thomsen et al.	DDMS	2016	English	No spatial analysis/visualization
Tran et al .	MCA risk mapping	2013	English	not an sdss, just map modeling
Trock et al.	IRAT	2012	English	No spatial analysis/visualization
Vanmeulebrouck et al.	GIS	2008	English	Include
Wangdi et al.	SDSS	2016	English	Include
Yan et al.	ISS	2013	English	Include
Yang et al.	CIDARS	2011	English	Not an SDSS, an auto mated alert system
