# Supplementary material for: A systematic review of spatial decision support systems in public health informatics supporting the identification of high risk areas for zoonotic disease outbreaks
Source: Int J Health Geogr. 2018 Oct 30;17:38. doi: 10.1186/s12942-018-0157-5 (PMC6208014; doi:10.1186/s12942-018-0157-5)
Supplement: Supplementary file 2 — Additional file 2. MMAT assessment: Articles assessed using the MMAT tool. [file 12942_2018_157_MOESM2_ESM.xlsx]

## Sheet: Sheet1
Qualitattive assessment			Ali		Bakr	Bouden	Bui		Campbell	Carney		Chame	Chen		Delmelle		Erranguntla	Ferre	Foley	Gao	Gesteland		Guo		Hernandez	Huang	Ianetti		Kelly		Li	Lorenzo	Maciejewski	Moraga	Peng	Perez	Platz	Porcasi	Ramirez-Ramirez	Rao		Rees	Savini	Vanmeulebrouk		Wangdi		Yan
MMAT Screening questions	Types of studies/questions	MMAT Screening questions	Response(yes/no/cant tell/NA)	Score			Response(yes/no/cant tell/NA)	Score		Response(yes/no/cant tell/NA)	Score		Response(yes/no/cant tell/NA)	Score	Response(yes/no/cant tell/NA)	Score					Response(yes/no/cant tell/NA)	Score	Response(yes/no/cant tell/NA)	Score			Response(yes/no/cant tell/NA)	Score	Response(yes/no/cant tell/NA)	Score										Response(yes/no/cant tell/NA)	Score			Response(yes/no/cant tell/NA)	Score	Response(yes/no/cant tell/NA)	Score
	Screening questions	Are there clear qualitative and quantitative research questions (or objectives*), or a clear mixed methods question (or objective*)?	Yes	4	No	No	Yes	4	No	Yes	4	No	Yes	4	Yes	4	Cant tell	No	No	No	Yes	4	Yes	4	No	No	Yes	4	Yes	4	No	No	No	No	No	No	No	Cant tell	no	Yes	4	No	No	Yes	4	Yes	4	No
		Do the collected data allow address the research question (objective)? E.g., consider whether the follow-up period is long enough for the outcome to occur (for longitudinal studies or study components).	Yes	4	No	Cant tell	Yes	4	No	Yes	4	Cant tell	Yes	4	Yes	4	Cant tell	No	No	Yes	Yes	4	Yes	4	Cant tell	Cant tell	Yes	4	Yes	4	Cant tell	Cant tell	Cant tell	Cant tell	Cant tell	Cant tell	No	Cant tell	Cant tell	Yes	4	Cant tell	No	Yes	4	Yes	4	Cant tell
		MMAt Study Qaulity items
MMAT Qaulitative studies	Qualitative	1.1. Are the sources of qualitative data (archives, documents, informants, observations) relevant to address the research question (objective)?					Yes	4													Yes	4																								Yes	4
		1.2. Is the process for analyzing qualitative data relevant to address the research question (objective)?					Yes	4													yes	4																								Yes	4
		1.3. Is appropriate consideration given to how findings relate to the context, e.g., the setting, in which the data were collected?					cant tell	2													yes	4																								Cant tell	2
		1.4. Is appropriate consideration given to how findings relate to researchers’ influence, e.g., through their interactions with participants?					no	3													cant tell	2																								No	3
	Quantitavtive randomized controll	2.1. Is there a clear description of the randomization (or an appropriate sequence generation)?
		2.2. Is there a clear description of the allocation concealment (or blinding when applicable)?
		2.3. Are there complete outcome data (80% or above)?
		2.4. Is there low withdrawal/drop-out (below 20%)?
	Quantitative non randomized	3.1. Are participants (organizations) recruited in a way that minimizes selection bias?
		3.2. Are measurements appropriate (clear origin, or validity known, or standard instrument; and absence of contamination between groups when appropriate) regarding the exposure/intervention and outcomes?
		3.3. In the groups being compared (exposed vs. non-exposed; with intervention vs. without; cases vs. controls), are the participants comparable, or do researchers take into account (control for) the difference between these groups?
		3.4. Are there complete outcome data (80% or above), and, when applicable, an acceptable response rate (60% or above), or an acceptable follow-up rate for cohort studies (depending on the duration of follow-up)?
MMAT qauntitative studies	Quantitative descriptive	4.1. Is the sampling strategy relevant to address the quantitative research question (quantitative aspect of the mixed methods question)?	Yes	4						Yes	4		Yes	4									Yes	4			Yes	4	Yes	4										Yes	4
		4.2. Is the sample representative of the population understudy?	Yes	4						Yes	4		Yes	4									Yes	4			Yes	4	Yes	4										Yes	4
		4.3. Are measurements appropriate (clear origin, or validity known, or standard instrument)?	Yes	4						Yes	4		Yes	4									Yes	4			Cant tell	2	Yes	4										No	3
		4.4. Is there an acceptable response rate (60% or above)?	NA	1						NA	1		NA	1									NA	1			NA	1	NA	1										No	3
MMAT Mixed studies	Mixed Methods	5.1. Is the mixed methods research design relevant to address the qualitative and quantitative research questions (or objectives), or thequalitative and quantitative aspects of the mixed methods question (or objective)?													Yes	4																												Yes	4
		5.2. Is the integration of qualitative and quantitative data (or results*) relevant to address the research question (objective)?													Yes	4																												Yes	4
		5.3. Is appropriate consideration given to the limitations associated with this integration, e.g., the divergence of qualitative and quantitative data (or results*) in a triangulation design?													NA	1																												Cant tell	2				Average
Score				0.875				0.875			0.875			0.875		0.85						0.916667		0.875				0.791667		0.875											0.916667				0.9		0.875		0.875
Summary			Quantitiative description		Design review with Case study	Design review with Simulation review	Qaulitative description		Design Review	Quantitiative description		Design Review	Quantitiative description		Mixed		Case study review	Design Review	Design Review	Design review with case study	Qaulitative description		Quantitiative description		Design review	Design review	Quantitiative description		Quantitiative description		Design review and Case study	Design review	Design review	Design review	Design review	Design review with siimulation study	Design review	Design Review	Design review with siimulation study	Quantitiative description		Design Review	Design Review	Mixed		Qaulitative description		Design review and pilot decription
