# Supplementary material for: A systematic review of spatial decision support systems in public health informatics supporting the identification of high risk areas for zoonotic disease outbreaks
Source: Int J Health Geogr. 2018 Oct 30;17:38. doi: 10.1186/s12942-018-0157-5 (PMC6208014; doi:10.1186/s12942-018-0157-5)
Supplement: Supplementary file 3 — Additional file 3. TIDieR assessment: Articles assessed using the TIDieR tool. [file 12942_2018_157_MOESM3_ESM.xlsx]

## Sheet: Sheet1
	Papers
TIDieR Item	Ali	Bui	Carney	Chen	Delmelle	Gesteland	Guo	Ianetti	Kelly	Rao	Vanmeulebrouk	Wangdi
Brief name of intervention	Development of visual analytics decision support system for data acquisition, management, analysis, and vizualization for surveillance tasks	Development of web-based integrated system for malaria surveillance	Devlopment of early warning system for West Nile virus outbreaks	Development of online platform to monitor dengue fever	Development of decision support system for practicianers to understand disease dynamics	Development of interactive vizualization system for disease surveillance	Development of framework to integrate spatial analysis, and data aggregation	Integrated web support system in veterinary epidemic emergencies	Development of a surveillance response system for Malaria elimination	Development of modeling tool to study avian influenza outbreaks, which allows different scenario analysis and visualization	An application developed to explore hypothesis testing though data integration and visualization to manage HIV/AIDS	Development of spatial decision support system to aid malaria elimination
Why	infectious disease surveillance and early outbreak detection	pattern detection by selecting paramters of interest by decision makers	Predict human outbreaks from sentinal cases	Detect emerging hot spots for dengue fever	Visualization of space time point events	Exploration of disease activity, detection and monitoring of regional infectious disease activity	To facilitate timely infectious disease analysis for a specific region	Web tool for assessing risk associated with specific locations and animal outbreaks	To guide responses to zones targeted for Malaria elemination	A surveillance tool to identify epicenters of avian influenza outbreaks	infrasture to plan managemnt of HIV/AIDs at the local level	System to identify areas of interst for malaria elimination
What materials	ID-Viewer was designed to integrate data from clinical and environmnetal data, case reports, chief complaint from ED, drug sales, wheather , temp, and rainfall	Malaria cases	Public reports of dead birds and case reports of west nile virus in humans	Confirmed cases of dengue fever, and demographic information	Infectious disease cases	Infectious disease cases	disease cases, geographic, climactic, remote sensing, demogrphic and environmnetal characteristics	Real time animal disease cases, and movement	Reported Malaria cases	Waterfowl migrations, species classification on risk, poultry and human population data, Census data	Usability data aprovided by municipal official, clinic staff and community leaders. Household sanitation, piped water and electricity, and demographic data	Case data and affected housholds
What procedures	Development of visual analytics archtechture that integrates data acquisition, storage, machine learning for surveillance, outbreak detection (including spatial scans), and response management	Development of health pattern detection system using density visualization and clustering algorithms: Nearest neighbor, K function, spatial autocorrelation	Integrated GIS and visualition platform for identifiying clusters of disease using knox test	Integreated platform to detect and visualize clusters of disease using spatial scan statistics	integrate spatial decision support for modeling of clusters using algorithms: k-function combined with kernel density, and knox test	Stakeholder engagment to build conceptual model from which prototype surveillance system is developed, powered by correlation algorithms (Pearson geometric), and undergoes usability testing	Data collected using web crawlers, stored, analyzed for spatial autocorrelation and prediction of cases using regression algorithms and displayed for decision support	Integration of social network modeling from animal movement	Identification of areas of interest for transission reservoirs, throug hmonitoring buffered zones of cases georeferenced	Integration of case data and geography with SIR modeling to simulate outbreaks	Scenario tests for usability SUS test, for assessing risk areas based on measurment of percentage of housholds with access amenities	Buffer zone around foci of infection to target intervention
Who provided	Local hospitals, pharmacies, and satelites imagery provided by MODIS and TRMM	open sources materials provided by (http://www.map.ox.ac.uk/explorer/http://www. map.ox.ac.uk/explorer/) and and the Lam Dong Department of Health and National Institute of Malariology Parasitology and Entemology	Public reports of dead birds and human cases collected from hotlines and online submission forms to the California department of health	Dengue cases collected by Taiwan Center for Disease Control, as well as demographics from the Taiwan Ministry of the interior	Local Hospitals	Emergency department data collected in Salt Lake County	Official government releases, news websites, social media, blogs	National Veterinary epedimiology bulletin, Animal disease notification system	Pacific Malaria Initiative Support Center, Provincial vector borne disease controil programme surveillance and the WHO	United States Census Bureau, Food and Agriculture Organization, Global Registre of Migratory Species	Statistics South Africa, 2001 census data, user provided data	Bhutan Ministry of Health, and local Vector borne disease control program, user provided data
How	Development of visual analytics archtechture ID-Viewer	Development of web based visualization and analytics tool	Development of DYCAST for spatiotemporal modeling	Development o foutbreak detection tool	Development of HELP, for for visualization of disease dynamics	Development of EpiCanvas for surveillance using conceptual model provided by users	Development of OSCAR, an integrated spatial analytic platform	Developemtn of integrated systems, EpiTrace and SiMAN	Development of spatial decision support surveillanc eresponse systems	Development of SEARUMS, to model and visualize disease spread	Development of GIS intergrated tool for	Development of spatial decision support system for identifying areas of interst for malaria outbreak
Where	Pakistan	All Vietnam provinces	California, USA	Taiwan	Cali, Columbia	Salt Lake Valley, USA	China	Italy	Solomon Islands and Vanuatu	International	South Africa	Bhutan
When and how much	real time data collected in 2014- 2016	several years leading up to 2015	2005	2014-2015	2004	2007-2008	2014	2009-2012	2011	Not specified	2001-2007	2009-2016
Tailoring	By adjusting the space time axis, user can track spread patterns going forward									Temporal characteristics of individual entities were modeled using a Markov process	System was tailored to two types of scenarios, indoor spraying and reactive case detection
Modification
How well planned	System evaluation for pattern detection was done	Scenarios for detecting clusters were introduced to users to verify useability	Testing of prediction rates were assessed for the previous epidemic data	Clusters were detected using cases confirmed from the previous year	During the development, usefulness and practicallity were assessed	Conceptual modeling of potential users was integrated throughout the design process	Measurement of significance of semsitivity of modeling procedures	Measures of acceptance over an introductory period were measured	Measurement of detected areas in a timely manner were assessed	Evaluations were planned to idenetify outbreak areas	Implemetation demonstrated a viable prototype	SDSS was used to evaluate malaria management
How well actualized	Results of evaluation indicate high fidelity to actual data and predicted data, outperforming existing classifiers	Feedback from end users indicated improvement to health related service	Sensitivity for prediction was acceptable and indicated timely warning	Sensitivity and specificity for hot spot detection to indicate better results as cases counts increased over time	Feedback indicated the system was generally usable and easy to understand	All participants agreed the tool would be useful for outbreak surveillance investigation		System use indicated user satisfaction for specific tasks that are highly accessed.	Challenges were identified to ensure cases are immediately reported to update the system	Results indicate potential to empower researchers to mitigate outbreak effects	Usability testing showed a high degree of usabililty	Informants identified some challenges, butoverall felt the SDSS was an improvement to current methods
Context	Outbreaks are difficult to detect in Pakistan due to scarcity of public data, and absencnce of automated surveillance systems	Concern for building interoperable health information systems to inform surveillance in Vietnam	Need to predict outbreaks of West Nile virus in California following a statewide epidemic	Need to address increased cases of Dengue in Southeast Asia	Desire to integrate GIS with decision making for assessments of health needs and services, and prevention resources	Need to address public health agencies cognitive tasks through interactive development of surveillance tool prototype	A Platform for emergency managemnt of public health concerned is of increasing concern to manage multiple data sources and analysis types.	Improvement of managemnet of public health emergencies, though integrtaed data and analysis	An effort to combat the global burben of Malaria, by developing a surveillance tool to identify transmission reservoirs	To assist preparedness for avian influenza outbreaks, a tool was developed to identify epicenters and temporal analysisi of outbreaks through simulation	To aid infrasture planning and managemnt at a local level, developemnt of a gis tool was developed to explore possibilities given limited governmnet resources	To assist the Malaria eliminiation program in Bhutan, a spatial decision support system was developed to support identification of as risk aareas
