# Supplementary material for: A systematic review of spatial decision support systems in public health informatics supporting the identification of high risk areas for zoonotic disease outbreaks
Source: Int J Health Geogr. 2018 Oct 30;17:38. doi: 10.1186/s12942-018-0157-5 (PMC6208014; doi:10.1186/s12942-018-0157-5)
Supplement: Supplementary file 4 — Additional file 4. SDSS summarization: Characteristics of final SDSS selection. [file 12942_2018_157_MOESM4_ESM.xlsx]

## Sheet: Sheet1
paper Author	Tool	date of pub.	retrospective or real time	Implementation, evaluation methods	Evaluation	Type of research	Target disease(What)	Target population	What materials data sources	Outbreak/Cluster identification method	Target user(Who)	User interface	geographic area	spatial visualization	spatial data managemnt	report generation	interactive problem solving	spatial modeling capability	semi structured prob solving	scenario eval	user centered design
Ali	ID-Viewer	2016	realtime	implementation and sensitivity testing experimentation	sensitivity	Qauntitatve descriptive	infectious disease	human	chief complaint from ED, drug sales, wheather , temp, rainfall,	Spatial dcan statistyoc for cluster detection, and forecasting using seasonal trend decomposition using loess	public health practicianer	u nspecified	Pakistan	heat maps, chloropleth maps	unspecified	summary, map, charts	selection of study area, time, layers to display: disease distribution, hydrology, can add collected data	spatia; scan statistics	monitoring disease spread for approachriate mitigation	visual analytics for syndromic clusters, election of covariates for prediction analytics. Allows user to explore different clusters to visualize and analyze for a given time serie	no
Bui	general WEB GIS	2016	infectious disease spatial analysis platform	Malaria and other zoonotic and infectious disease	usability/usefulness	Qaulitative description	Malaria	humans	Malaria cases	pattern detection by selecting paramters of interst by decision makers	public sector users	web	Vietnam	Postgresql and Geoserver, OpenLayers	Vietnam			summary stats	change algorithm, parameters, and layers	modeling clustering of disease	use maps and stats to inform decision making	vizualize current cases for the selected paramters	prototype tested for usability after development
Carney	Dycast	2011	real time	implementation and validation using sensitivity and specificity	sensitivity	Qauntitative description	WNV	animal	regional public input	knox test	state or local	application	NY, and Ca	risk maps	mysql, ArcIms	maps, daigrams	manipulation of buttons and maps for charting and vizualizing scenarios	Statscan	able to test theories of virus transmission	change map views of outbreaks	after design interviews and input
Chen	WEB GIS	2016	Retrospective	implementation and validation using sensitivity and specificity	sensitivity	Qauntitative description	dengue	human	case data from local disease control, age, onset, location, demographics	spatial scan	public health workers	application	Taiwan	chloropleth maps	openlayers, highcharts	plots, timelapse movies	choose parameters, like spatial window, and total population	space time scan stats	monitor outbreaks only with spatial scans only	compare sensitivity with varying parameters	no
Delmelle	Help	2011	Retrospective	implementation andcontingency and user evaluation	Significance, usability/usefulness	Mixed Methods	infectious disease	human	hospital case data	Spatial clustering using the k function and knox test	health team: many positions	application	Colombia	maps, charts	ArcGIS	charts	querying, selecting paramters	clustering	vizualize space time clustering on contour map to aid admins	different time periods, different diseases, number of monte carlo scenarios	Breid survey asking about usefulness
Gesteland	EpiCanvas	2012	Retrospective	implementation and usability evaluation	usability/usefulness	Qaulitative description	infectious disease	human	hospital er	correlation algorithms	health practicianer	application	Salt lake region	maps, web map	ArcGIS	network maps,	user slection of outbreak time length, can explore metadata	map of disease activity levels	user selection of tags to visualize	yes, interviews and usability testing	stakeholder goals obtained before design,useability and usefulness eval	user accesses
Guo	OSCAR	2017	real	implementation and validation though significance modleing	significance of modeled spatial autcorrelation, sensitivity testing for	Qauntitiative description	infectious disease, influenza	human	web craweled data from online resources: remote sensing, govt reported data, climate, socio-econ, twitter, blogs	Morans I, OLS, GLS, SEM regression, bayesian modeling	public health orkers, policy makers	cloud computing/web	international	maps, charts, poin and polygon layers	Hbase, MySQL, OpenLayers	charts, maps	choose modeling, diease		schedule analysis, hypothesis testing		no
Iannetti	EpiTrace/SIMAN	2014	real	implementation	user traffic counts, percentage of outbreaks investigated and identified using system	Qauntitiative description	contagious animal disease	animal	Animal disese reporting system of OIE: animal movement	Network modeling to identify nodes responsible for disease spread	veterinary health practicianer	web app	Italy regions	maps, charts	Google maps	network maps,	selection of variables like SIR, province, lat/lon	modeling livestock locations and cases	dynamically explore a network through vizualization	change location and recovery, opulation studied	user survey after devlopment
Kelly	SDSS	2013	real	implementation and validation	percent cases detected	Qauntitiative description	Malaria	human	Case data from local disease control	Identification of areas of interest for transission reservoirs, through buffered zones of cases georeferenced	public health practicianer	application	soloman islands	maps	unspecified GIS	maps	interactive mapping	modeling transmission routes	change parameters to ID area of interest	track different species	yes, consultation, then pilot study, no usability follow up
Rao	Searums	2009	Retrospective	implementation and validation	simulated morbidity and mortality significance	Qauntitatve descriptive	Influenza	human	bird migration,bird risk classification, Global poultry population, human population data, United States census	Integration of case data and geography with SIR modeling to simulate outbreaks	health practicianer	application	international	maps, charts, point layers	unspecified GIS	output maps, charts	selection of species for visualization, mapping radius, color, etc, graph views	modeling of species distibution and migration, and infected areas	use maps and stats to inform decision making	change vizualization and charting settings for simulation	no
Vanmeulebrouck	GIS	2008	Retrospective	implementation and user evaluation	user traffic, usability/usefulness	mixed methods	HIV	human	local community data such as sanitation, piped watre,and electricity. user entered data	Assessing risk areas based on measurment of percentage of housholds with access to sanitation, piped water and electricity	health practicianer	web	South Africa	maps. Charts	postgresm MaPSCRIPT	map, summary stats	selection of area of study	risk maps	use maps and stats to inform decision making	vizualize current cases for the selected paramters	usabuiity testing
Wangdi	SDSS	2016	Real	implementation and user evaluation	usability/usefulness	qaulitative	Malaria	human	district screening of cases, allows user to upload data on household locations and cases	buffer zone around foci of infection	health practicianer	application	Bhutan	maps, charts, point layers	QGIS	yes	selection of study area, time, layers to display,	display of at risk households	use maps and stats to inform decision making	vizualize current cases for the selected paramters	usabuiity testing
